# Supplementary material for: Dedifferentiation of Primary Hepatocytes is Accompanied with Reorganization of Lipid Metabolism Indicated by Altered Molecular Lipid and miRNA Profiles
Source: MDPI journal article supplement (doi:10.3390/ijms20122910), 2019-06-14
Supplement: s1 [file s1]

**Supplemental table S1a.** List of the studied liver-specific genes in PHHs using SYBR green-based real-time quantitative PCR (QPCR). GAPDH was used as the endogenous control gene.

| Gene symbol  | Gene name                                | Forward primer 5'-3' | Reverse primer 5'-3'   |
|--------------|------------------------------------------|----------------------|------------------------|
| <i>FOXA2</i> | Forkhead box A2                          | AAGACCTACAGGCGCAGCT  | CATCTTGTGGGGCTCTGC     |
| <i>AFP</i>   | Alpha fetoprotein                        | CGCTGCAAACGATGAAGCAG | AATCTGCAATGACAGCCTCAAG |
| <i>ALB</i>   | Albumin                                  | GAAAAGTGGGCAGCAAATGT | GGTTCAGGACCACGGATAGA   |
| <i>GAPDH</i> | Glyceraldehyde-3-phosphate dehydrogenase | AGCCACATCGCTCAGACACC | GTACTCAGCGCCAGCATCG    |

**Supplemental table S1b.** List of the studied genes related to the lipids, fatty acids, as well as glucose metabolism in cultured primary human hepatocytes using TaqMan-based real-time quantitative PCR (qPCR) assays. Both GAPDH and B2M were used as the endogenous controls.

| Gene symbol   | Gene name                                                     | TaqMan assay ID |
|---------------|---------------------------------------------------------------|-----------------|
| <i>FASN</i>   | Fatty acid synthase                                           | Hs01005622_m1   |
| <i>SCD</i>    | Stearoyl-CoA desaturase                                       | Hs01682761_m1   |
| <i>FADS1</i>  | Fatty Acid Desaturase 1                                       | Hs01096545_m1   |
| <i>FADS2</i>  | Fatty Acid Desaturase 2                                       | Hs00927433_m1   |
| <i>ELOVL1</i> | Elongation of very-long chain fatty acids 1                   | Hs00967951_g1   |
| <i>ELOVL2</i> | Elongation of very-long chain fatty acids 2                   | Hs00214936_m1   |
| <i>ELOVL3</i> | Elongation of very-long chain fatty acids 3                   | Hs00537016_m1   |
| <i>ELOVL5</i> | Elongation of very-long chain fatty acids 5                   | Hs01094711_m1   |
| <i>ELOVL6</i> | Elongation of very-long chain fatty acids 6                   | Hs00907565_m1   |
| <i>ELOVL7</i> | Elongation of very-long chain fatty acids 7                   | HS00405151_m1   |
| <i>GCK</i>    | Glucokinase                                                   | Hs01564555_m1   |
| <i>PKLR</i>   | Liver-type pyruvate kinase                                    | Hs00176075_m1   |
| <i>PCK1</i>   | Phosphoenolpyruvate carboxykinase                             | Hs00159918_m1   |
| <i>CERS1</i>  | Ceramide synthase 1                                           | Hs04195319_s1   |
| <i>CERS2</i>  | Ceramide synthase 2                                           | Hs00371958_g1   |
| <i>CERS4</i>  | Ceramide synthase 4                                           | Hs00226114_m1   |
| <i>CERS5</i>  | Ceramide synthase 5                                           | Hs00908759_m1   |
| <i>CERS6</i>  | Ceramide synthase 6                                           | Hs00826756_m1   |
| <i>SGMS1</i>  | Sphingomyelin synthase 1                                      | Hs00983630_m1   |
| <i>SGMS2</i>  | Sphingomyelin synthase 2                                      | Hs00380453_m1   |
| <i>UGCG</i>   | UDP-glucose ceramide glucosyltransferase                      | Hs00234293_m1   |
| <i>SMPD1</i>  | Sphingomyelin phosphodiesterase 1                             | Hs03679347_g1   |
| <i>ASAHI</i>  | N-acylsphingosine amidohydrolase (acid ceramidase) 1          | Hs00602774_m1   |
| <i>ASA2</i>   | N-acylsphingosine amidohydrolase (non-lysosomal ceramidase) 2 | Hs01025305_m1   |
| <i>B2M</i>    | Beta-2-microglobulin                                          | Hs99999907_m1   |
| <i>GAPDH</i>  | Glyceraldehyde-3-phosphate dehydrogenase                      | Hs99999905_m1   |
